# Supplementary material for: R-spondin signalling is essential for the maintenance and differentiation of mouse nephron progenitors
Source: eLife. 2020 May 1;9:e53895. doi: 10.7554/eLife.53895 (PMC7228766; doi:10.7554/eLife.53895)
Supplement: Figure 2—source data 1. — Worksheet 1 - source data for Figure 2B: Quantification of proliferating (BrdU+) progenitor cells (SIX2+) in controls and CAGGCreERTM-DM. Worksheet 2 - source data for Figure 2C: Quantification of apoptotic (TUNEL+) progenitor cells (SIX2+) in controls and CAGGCreERTM-DM. Worksheet 3 - source data for Figure 2E: Quantification of progenitor cells (SIX2+) in controls and mutant (Six2:Cre, Ctnnb1 fl/fl) samples. [file elife-53895-fig2-data1.xls]

## Sheet: Fig. 2B- Quantif BrdU CAGCre
Figure 2B: Quantification of proliferating (BrdU+) progenitor cells (Six2+) in controls and CAGGCreERTM DM
Control samples				CAGG:CreERTM DM samples
Sample ID: D506-9				Sample ID: D506-1
Genotype: Rspo1 -/+, Rspo3 flox/flox	Nbr Six2+ cells	Nbr BrdU+ SIX2+ cells		Genotype: CGAG:CreERTM, Rspo1 -/-, Rspo3 flox/flox	Nbr Six2+ cells	Nbr BrdU+ SIX2+ cells
1Ko/+, 3F/F				Section 1
Section 1	670	326		Section 2	323	83
Section 2	447	157		Section 3	426	112
Section 3	423	179		Section 4	201	74
Section 4	603	224		Section 5	250	65
Section 5	405	205		Section 6	453	95
Section 6	433	157		Section 7	371	111
Section 7	610	275		Section 8	351	80
Section 8	418	181		Section 9	483	110
Total	4009	1704		Section 10	452	121
Ratio	42.5044			Section 11	372	97
				Section 12	320	79
				Section 13	306	72
				Section 14	475	111
Sample ID: D506-2				Section 15	347	119
Genotype: Rspo1 -/+, Rspo3 flox/flox				Section 16	472	97
Section 1	483	171		Section 17	471	104
Section 2	386	160		Total	6073	1530
Section 3	479	157		Ratio	25.1935
Section 4	547	234
Section 5	537	205
Section 6	532	226
Section 7	369	180		Sample ID: D506-3
Section 8	501	188		Genotype: cGAG:CrERTM, Rspo1 -/-, Rspo3 flox/flox
Section 9	496	234		Section 1	352	80
Section 10	491	248		Section 2	385	86
Section 11	588	167		Section 3	420	89
Section 12	450	243		Section 4	357	86
Section 13	406	164		Section 5	347	119
Section 14	474	177		Section 6	315	95
Section 15	656	262		Section 7	375	109
Section 16	442	197		Section 8	279	69
Section 17	714	200		Section 9	290	91
Section 18	678	215		Section 10	458	123
Section 19	516	175		Section 11	460	114
Section 20	568	195		Section 12	236	86
Section 21	515	192		Section 13	261	103
Section 22	424	124		Section 14	223	85
Section 23	560	182		Total	4758	1335
Section 24	393	153		Ratio	28.058
Section 25	396	146
Section 26	531	166
Total	13132	4961
Ratio	37.7779			Sample ID: D506-4
				Genotype: cGAG:CrERTM, Rspo1 -/-, Rspo3 flox/flox
				Section 1	170	50
				Section 2	281	70
				Section 3	322	84
				Section 4	306	85
Sample ID: D911-2				Section 5	202	56
Genotype Rspo1 1-/+, Rspo3 flox/flox				Section 6	245	51
Section 1	623	253		Section 7	284	101
Section 2	573	287		Total	1810	497
Section 3	573	277		Ratio	27.4586
Section 4	565	197
Section 5	594	238
Section 6	412	212
Section 7	360	223		Sample ID: D234-10
Section 8	402	212		Genotype: cGAG:CrERTM, Rspo1 -/-, Rspo3 flox/flox
Section 9	525	259		Section 1	500	127
Section 10	482	213		Section 2	522	112
Section 11	600	267		Section 3	411	74
Section 12	640	242		Section 4	549	119
Section 13	593	302		Section 5	521	104
Section 14	558	210		Section 6	462	149
Section 15	751	229		Section 7	538	141
Section 16	626	331		Section 8	453	182
Section 17	329	235		Section 9	478	171
Total	9206	4187		Section 10	573	138
Ratio	45.4812			Section 11	451	116
				Section 12	375	136
				Section 13	384	144
Sample ID: D234 5				Section 14	525	182
Genotype: Rspo3 flox/flox				Section 15	460	151
Section 1	1132	352		Section 16	526	122
Section 2	1143	400		Section 17	672	146
Section 3	840	376		Section 18	525	165
Section 4	697	268		Section 19	532	161
Section 5	547	260		Section 20	702	158
Section 6	586	272		Section 21	600	140
Section 7	571	257		Section 22	719	186
Section 8	497	242		Section 23	490	104
Section 9	505	188		Section 24	518	130
Section 10	503	266		Section 25	719	169
Section 11	494	247		Section 26	665	156
Section 12	409	192		Section 27	562	155
Section 13	475	231		Section 28	645	73
Section 14	474	210		Section 29	552	77
Section 15	453	180		Section 30	509	72
Section 16	494	252		Section 31	589	70
Section 17	672	368		Section 32	629	59
Section 18	445	220		Section 33	445	62
Section 19	935	300		Section 34	481	62
Section 20	560	230		Section 35	595	59
Section 21	901	346		Section 36	507	33
Section 22	635	220		Section 37	587	34
Section 23	720	266		Section 38	453	44
Section 24	427	158		Total	20424	4483
Section 25	797	317		Ratio	21.9497
Section 26	319	165
Section 27	1006	371
Section 28	425	180
Total	17662	7334
Ratio	41.5242

## Sheet: Fig. 2C-Apop CAGCre
Figure 2C: Quantification of apoptotic (Tunel) progenitor cells (Six2+) in controls and CAGGCreERTM DM
Control samples				CAGG:CreERTM DM samples
Sample ID: D257-2				Sample ID: D257 12
Genotype: Rspo3 flox/flox	Nbr Six2+ cells	Nbr Apoptotic Six2+ cells		Genotype: CAGG:CreERTM, Rspo1 -/-, Rspo 3 flox/flox	Nbr Six2+ cells	Nbr Apoptotic Six2+ cells
Section 1	460	2		Section 1	438	17
Section 2	850	4		Section 2	336	10
Section 3	962	0		Section 3	406	13
Section 4	989	5		Section 4	434	12
Section 5				Section 5	435	23
Section 6	787	1		Section 6	431	24
Section 7	402	4		Section 7	537	26
Section 8	1027	4		Section 8	546	30
Section 9	980	5		Section 9	390	26
Section 10	885	3		Section 10	607	19
Section 11	800	2		Section 11	625	18
Section 12	1004	4		Section 12	564	21
Section 13	912	7		Section 13	623	17
Section 14	762	4		Sum	6372	256
Sum	10820	45		Ratio	4.01758
Ratio	0.415896
Sample ID: D234 5				Sample ID: D234 10
Genotype: Rspo3 flox/flox	Six2	Apo Six2		Genotype: CAGG:CreERTM, Rspo1 -/-, Rspo 3 flox/flox	Six2	Apo Six2
Section 1	925	4		Section 1	469	13
Section 2	794	1		Section 2	426	8
Section 3	520	2		Section 3	572	18
Section 4	910	3		Section 4	621	22
Section 5	746	1		Section 5	622	10
Section 6	645	0		Section 6	568	3
Section 7	800	0		Section 7	627	7
Section 8	700	11		Section 8	606	9
Section 9	613	0		Section 9	587	8
Section 10	574	2		Section 10	772	8
Section 11	598	0		Section 11	475	4
Sum	7825	24		Sum	6345	110
Ratio	0.306709			Ratio	1.73365
Sample ID: D234 1				Sample ID: D234 8
Genotype: Rspo3 flox/flox	Number Six2 cells	Apototic Six2 cells		Genotype: CAGG:CreERTM, Rspo1 -/-, Rspo 3 flox/flox	Six2	Apo Six2
Section 1	818	1		Section 1	923	11
Section 2	637	2		Section 2	658	14
Section 3	1056	0		Section 3	704	10
Section 4	960	3		Section 4	740	14
Section 5	1027	2		Section 5	760	28
Section 6	940	1		Section 6	520	14
Section 7	662	1		Sum	4305	91
Section 8	824	5		Ratio	2.11382
Section 9	1165	2
Section 10	914	2
Section 11	752	2
Section 12	687	4
Sum	10442	25
Ratio	0.239418

## Sheet: Fig. 2E- count Six2in bCat mut
Figure 2E: Quantification of progenitor cells (Six2+) in (Six2:Cre, Ctnnb1 flox/flox) controls and mutants samples
Controls samples			Mutants samples
	Nbr SIX2+ cells			Nbr of Six2+ Cells
Sample ID: Bf1091-2			Sample ID: Bf109-1
Genotype: Ctnnb1 flox/flox			Genotype: Six2:Cre, Ctnnb1 flox/flox
Section 1	1272		Section 1	85
Section 2	1394		Section 2	84
Section 3	1423		Section 3	56
Average	1363		Average	75
Sample ID: Bf109 6			Sapmle ID: Bf109-4	Six2 Cells
Genotype: Ctnnb1 flox/flox			Genotype: Six2:Cre, Ctnnb1 flox/flox
Section 1	1099		Section 1	150
Section 2	1211		Section 2	96
Section 3	1320		Section 3	124
Average	1210		Average	123.333
Sample ID: Bf109 6
Genotype: Ctnnb1 flox/flox			Sample ID: Bf145-7	Six2 Cells
Section 1	1740		Genotype: Six2:Cre, Ctnnb1 flox/flox
Section 2	1168		Section 1	61
Section 3	1124		Section 2	78
Average	1344		Section 3	27
			Average	55.3333
Sample ID: Bf 145-4
Genotype: Ctnnb1 flox/flox			Sapmle ID: Bf145-7	Six2 Cells
Section 1	992		Genotype: Six2:Cre, Ctnnb1 flox/flox
Section 2	1005		4B Sec2	41
Section 3	982		4B Sec3	47
Average	993		4B Sec4	75
			Average	54.3333
