# Supplementary material for: R-spondin signalling is essential for the maintenance and differentiation of mouse nephron progenitors
Source: eLife. 2020 May 1;9:e53895. doi: 10.7554/eLife.53895 (PMC7228766; doi:10.7554/eLife.53895)
Supplement: Figure 3—source data 1. — Worksheet 1 - source data for Figure 3C: Quantification of progenitor cells (SIX2+) in controls and Foxd1:Cre-DM at E14.5. Worksheet 2 - source data for Figure 3D: Quantification of progenitor cells (SIX2+) in controls and Foxd1:Cre-DM at E18.5. [file elife-53895-fig3-data1.xls]

## Sheet: Fig. 3C- Six2+ Foxd1Cre  E14
Figure 3C: Quantification of progenitor cells (Six2+) in controls and Foxd1:Cre DM at E14.5
Control samples			Foxd1:Cre DM mutants
	Nbr Six2+ cells			Nbr Six2+ cells
Sample ID: Wek 75 4			Sample ID: Wek 75 7
Genotype: Rspo1 -/+, Rspo 3 flox/+			Genotype: Foxd1:Cre, Rspo1 -/-, Rspo3 flox/flox
Section 1	1036		Section 1	1577
Section 2	1006		Section 2	1254
Section 3	988		Section 3	1226
Average	1010		Average	1352.33
Sample ID: Wek 75 3			Sample ID: Wek 75 6
Genotype: Rspo1 -/+, Rspo3 flox/+			Genotype: Foxd1:Cre, Rspo1 -/-, Rspo3 flox/flox
Section 1	1007		Section 1	464
Section 2	1053		Section 2	469
Section 3	983		Section 3	496
Average	1014.33		Average	476.333
Sample ID: Wek 75 1			Sample ID: Wek 75 2
Genotype: Rspo1 -/+, Rspo3 flox/+			Genotype: Foxd1:Cre, Rspo1 -/-, Rspo3 flox/flox
Section 1	797		Section 1	1000
Section 2	855		Section 2	976
Section 3	1013		Section 3	1208
Average	888.333		Average	1061.33
Sample ID: Wek 75 4			Sample ID: Wek 75 2
Genotype: Rspo1 -/+, Rspo3 flox/+			Genotype: Foxd1:Cre, Rspo1 -/-, Rspo3 flox/flox
Section 1	1391		Section 1	1102
Section 2	1289		Section 2	913
Section 3	1007		Section 3	1081
Average	1229		Average	1032

## Sheet: Fig. 3D- Six2+ Foxd1Cre  E18
Figure 3D: Quantification of progenitor cells (Six2+) in controls and Foxd1:Cre DM at E18.5
Control samples			Foxd1:Cre DM mutants
	Nbr Six2+ cells			Nbr Six2+ cells
Sample ID:Wek 35 9			Sample ID: Wek 35 3
Genotype: Rspo1 -/-, Rspo 3 flox/flox			Genotype: Foxd1:Cre, Rspo1 -/-, Rspo3 flox/flox
Section 1	2187		Section 1	636
Section 2	2545		Section 2	506
Section 3	2447		Section 3	650
Average	2393		Average	597.333
Sample ID: Wek 35 1			Sample ID: Wek 35 8
Genotype: Foxd1:Cre, Rspo1 -/+, Rspo3 flox/+			Genotype: Foxd1:Cre, Rspo1 -/-, Rspo3 flox/flox
4A S2	2091		Section 1	796
4A S3	2309		Section 2	840
4A S4	2029		Section 3	741
Average	2143		Average	792.333
Sample ID: Wek 36 4			Sample ID: Wek 36 1
Genotype: Rspo1 -/+, Rspo3 flox/+			Genotype: Foxd1:Cre, Rspo1 -/-, Rspo3 flox/flox
Section 1	1540		Section 1	1225
Section 2	1637		Section 2	1149
Section 3	1698		Section 3	1365
Average	1625		Average	1246.33
