# Supplementary material for: R-spondin signalling is essential for the maintenance and differentiation of mouse nephron progenitors
Source: eLife. 2020 May 1;9:e53895. doi: 10.7554/eLife.53895 (PMC7228766; doi:10.7554/eLife.53895)
Supplement: Figure 4—source data 1. [file elife-53895-fig4-data1.xls]

## Sheet: Fig. 4E Axin2 RNAScope
Figure 4E: Quantification Axin2 RNA-Scope signal
	Embryos ID	Area analysis			signa/cellules	Embryo genotype
Image Tag		Analysis Region	Cell Count	Total Signal Count	Outer layer
VV-3_Scan1.qptiff	2SD430-5	section 1-Kidney1	3482	9959	2.86014	Six2:Cre, 1Ko/Ko, 3F/F
VV-3_Scan1.qptiff	2SD430-5	section 1-Kidney2	637	2260	3.54788
VV-3_Scan1.qptiff	2SD430-5	section 2-Kidney1	1583	2819	1.7808
VV-3_Scan1.qptiff	2SD430-5	section 2-Kidney2	984	2715	2.75915
VV-3_Scan1.qptiff	2SD430-5	section 3-Kidney1	1338	3176	2.37369
VV-3_Scan1.qptiff	2SD430-5	section 3-Kidney2	849	3271	3.85277
VV-5_Scan1.qptiff	D253-4	section 1-Kidney1	2840	20027	7.05176	1Ko/+, 3F/+
VV-5_Scan1.qptiff	D253-4	section 2-Kidney1	3840	26451	6.88828
VV-5_Scan1.qptiff	D253-4	section 3-Kidney1	4276	20944	4.89804
VV-5_Scan1.qptiff	D253-4	section 4-Kidney1	3549	24772	6.97999
VV-5_Scan1.qptiff	D253-4	section 5-Kidney1	2985	19351	6.48275
VV-5_Scan1.qptiff	D253-4	section 6-Kidney1	3245	19412	5.98213
VV-6_Scan1.qptiff	D253-8	section 1-Kidney1	1600	8455	5.28437	Six2:Cre, 1Ko/Ko, 3F/F
VV-6_Scan1.qptiff	D253-8	section 1-Kidney2	1000	4053	4.053
VV-6_Scan1.qptiff	D253-8	section3-Kidney1	1451	4561	3.14335
VV-6_Scan1.qptiff	D253-8	section3-Kidney2	1660	4842	2.91687
VV-6_Scan1.qptiff	D253-8	section4-Kidney1	3304726	2197040	0.664818
VV-6_Scan1.qptiff	D253-8	section4-Kidney2	1622	6753	4.16338
VV-6_Scan1.qptiff	D253-8	section5-Kidney1	1362	4107	3.01542
VV-6_Scan1.qptiff	D253-8	section5-Kidney2	1524	4935	3.23819
VV-7_Scan1.qptiff	D179-10	section1-Kidney1	3535	9332	2.63989	Six2:Cre, 1Ko/Ko, 3F/F
VV-7_Scan1.qptiff	D179-10	section2-Kidney1	1818	7471	4.10946
VV-7_Scan1.qptiff	D179-10	section3-Kidney1	1692	5270	3.11466
VV-7_Scan1.qptiff	D179-12	section4-Kidney1	2612	9844	3.76876	3F/+
VV-7_Scan1.qptiff	D179-12	section4-Kidney2	842	4184	4.96912
VV-7_Scan1.qptiff	D179-12	section5-Kidney1	1918	12034	6.27424
VV-7_Scan1.qptiff	D179-12	section5-Kidney2	720	3883	5.39306
VV-7_Scan1.qptiff	D179-12	section6-Kidney1	2146	17577	8.19059
VV-7_Scan1.qptiff	D179-12	section6-Kidney2	1057	9319	8.81646
VV-7_Scan1.qptiff	D179-3	section7-Kidney1	1239	1922	1.55125	Six2:Cre, 1Ko/Ko, 3F/F
VV-7_Scan1.qptiff	D179-3	section7-Kidney2	1405	2485	1.76868
VV-7_Scan1.qptiff	D179-3	section8-Kidney1	1295	4088	3.15676
VV-7_Scan1.qptiff	D179-3	section8-Kidney2	1299	5397	4.15473
VV-7_Scan1.qptiff	D179-3	section9-Kidney1	1081	3869	3.57909
VV-7_Scan1.qptiff	D179-3	section9-Kidney2	1550	5283	3.40839
VV-9_Scan1.qptiff	D55-4	section1-Kidney1	1352	653	0.482988	Six2:Cre, 1Ko/Ko, 3F/F
VV-9_Scan1.qptiff	D55-4	section2-Kidney1	1192	1919	1.6099
VV-9_Scan1.qptiff	D55-4	section3-Kidney1	1520	2319	1.52566
VV-1_Scan1.qptiff	2SD430-9	section1-Kidney1	1343	11292	8.40804	1Ko/Ko, 3F/F
VV-1_Scan1.qptiff	2SD430-9	section1-Kidney2	1252	8056	6.4345
VV-1_Scan1.qptiff	2SD430-9	section2-Kidney1	1304	8617	6.60813
VV-1_Scan1.qptiff	2SD430-9	section2-Kidney2	2044	9374	4.58611
VV-1_Scan1.qptiff	2SD430-9	section3-Kidney1	1266	10415	8.2267
VV-1_Scan1.qptiff	2SD430-9	section3-Kidney2	1685	8045	4.77448
VV-2_Scan1.qptiff	2SD430-3	section1-Kidney1	1248	4206	3.37019	Six2:Cre, 1Ko/Ko, 3F/F
VV-2_Scan1.qptiff	2SD430-3	section2-Kidney1	1212	4642	3.83003
VV-2_Scan1.qptiff	2SD430-3	section3-Kidney1	1551	3348	2.15861
VV-2_Scan1.qptiff	2SD430-3	section4-Kidney1	1487	2634	1.77135
VV-B_Scan1.qptiff	2SD56-6	section5-Kidney1	817	1591	1.94737	Six2:Cre, 1Ko/Ko, 3F/F
VV-B_Scan1.qptiff	2SD56-6	section5-Kidney2	971	2721	2.80227
VV-B_Scan1.qptiff	2SD56-4	section1-Kidney1	1095	2963	2.70594	1Ko/+, 3F/+
VV-B_Scan1.qptiff	2SD56-4	section1-Kidney2	1092	4537	4.15476
VV-B_Scan1.qptiff	2SD56-4	section2-Kidney1	1678	6678	3.97974
VV-B_Scan1.qptiff	2SD56-4	section2-Kidney2	1196	5236	4.37793
VV-B_Scan1.qptiff	2SD56-4	section3-Kidney2	995	1572	1.5799
