# Supplementary material for: R-spondin signalling is essential for the maintenance and differentiation of mouse nephron progenitors
Source: eLife. 2020 May 1;9:e53895. doi: 10.7554/eLife.53895 (PMC7228766; doi:10.7554/eLife.53895)
Supplement: Figure 5—source data 1. — Worksheet 1 - source data for Figure 5D: Quantification of RNA expression in in vitro culture experiments. Worksheet 2 – source data for Figure 5F: Quantification of pSMAD1/5 positive cells within the nephrogenic zone. [file elife-53895-fig5-data1.xls]

## Sheet: Fig. 5D In vitro cult qPCR
Figure 5D: Quantification of RNA expression in in vitro culture experiments
Axin2 test	Cp	Cp normalised to Ctrl Cp	Axin2	Sdha	Fold change
H2O
Control (medium only)	29.5	0	1	1	1
CHIR	26.01	3.49	11.2356	1.28343	8.75435
WNT3A	29.08	0.42	1.33793	1.18921	1.12506
RSPO3 WNT3A	28.25	1.25	2.37841	1.6245	1.46409
RSPO3	29.29	0.21	1.15669	1.40444	0.823591
Control (medium only)	29.79	0	1	1	1
CHIR	26.01	3.78	13.737	1.03526	13.2691
WNT3A	29.5	0.29	1.22264	0.97942	1.24833
RSPO3 WNT3A	28.09	1.7	3.24901	1.03526	3.13834
RSPO3	28.35	1.44	2.71321	1.27456	2.12874
Control (medium only)	29.44	0	1	1	1
CHIR	25.77	3.67	12.7286	1.04972	12.1257
WNT3A	29.15	0.29	1.22264	1.09429	1.11729
RSPO3 WNT3A	28.22	1.22	2.32947	0.97942	2.37841
RSPO3	28.71	0.73	1.65864	1.16473	1.42405
Wnt4 test	Cp	Cp normalised to Ctrl Cp	Wnt4	Sdha	Fold change
H2O
Control (medium only)	30.03	0	1	1	1
CHIR	23.32	6.71	104.691	1.28343	81.5719
WNT3A	29.16	0.87	1.82766	1.18921	1.53688
RSPO3 WNT3A	27.71	2.32	4.99332	1.6245	3.07375
RSPO3	28.23	1.8	3.4822	1.40444	2.47942
Control (medium only)	29.84	0	1	1	1
CHIR	23.49	6.35	81.5719	1.03526	78.7932
WNT3A	29.66	0.18	1.13288	0.97942	1.15669
RSPO3 WNT3A	27.56	2.28	4.85678	1.03526	4.69134
RSPO3	27.96	1.88	3.68075	1.27456	2.88786
Control (medium only)	29.83	0	1	1	1
CHIR	23.66	6.17	72.0037	1.04972	68.5935
WNT3A	29.27	0.56	1.47427	1.09429	1.34723
RSPO3 WNT3A	27.89	1.94	3.83706	0.97942	3.91768
RSPO3	28.29	1.54	2.90795	1.16473	2.49666
SDHA test	Cp	Cp normalised to Ctrl Cp	Sdha
H2O
Control (medium only)	23.44	0	1
CHIR	23.08	0.36	1.28343
WNT3A	23.19	0.25	1.18921
RSPO3 WNT3A	22.74	0.7	1.6245
RSPO3	22.95	0.49	1.40444
Control (medium only)	23.11	0	1
CHIR	23.06	0.05	1.03526
WNT3A	23.14	-0.03	0.97942
RSPO3 WNT3A	23.06	0.05	1.03526
RSPO3	22.76	0.35	1.27456
Control (medium only)	22.93	0	1
CHIR	22.86	0.07	1.04972
WNT3A	22.8	0.13	1.09429
RSPO3 WNT3A	22.96	-0.03	0.97942
RSPO3	22.71	0.22	1.16473

## Sheet: Fig. 5F pSMAD quantif
Figure 5D: Quantification of pSMAD1/5 positive cells in the nephrogenic zone
Embryo ID	NPC	NPC-PSMAD+		Embryo ID	NPC	NPC-PSMAD+
D56-4 (1ko/+, 3F/+)				2SD56-6 (Six2:Cre, 1Ko/Ko, 3F/F)
Sec1	36	14		Sec1	35	0
	32	7			25	0
	15	4		Sec2	63	5
Sec1a	32	6			31	0
	54	15			37	0
	26	5		Sec3	19	0
	33	11			47	0
Sec2	45	13			29	0
	51	9			22	0
	39	7		Sum	308	5
Sec2a	67	16		Average	1.62338
	47	11
	48	10
	30	9
	30	5
	36	7		Embryo ID	NPC	NPC-PSMAD+
Sec3	20	5
	52	8		D55-4 (Six2:Cre, 1Ko/Ko, 3F/F)
	21	2		Sec2	49	0
	24	8			26	0
	38	7			22	0
Sec3a	23	5			22	0
	56	14		Sec1	35	0
	33	4			37	0
					20	0
Sum	888	202			38	0
Average	22.7477			Sec3	32	0
					41	0
					26	0
					34	0
Embryo ID	NPC	NPC-PSMAD+			30	0
				Sec1	26	9
D55-5 (1Ko/+, 3F/F)					44	0
Sec1a	39	13			25	0
	30	5			21	0
	29	9
	32	10		Sum	528	9
Sec2	73	27		Average	1.70455
	30	10
	33	11
	34	9		Embryo ID	NPC	NPC-PSMAD+
	79	22		D179-10 (Six2:Cre, 1Ko/Ko, 3F/F)
Sec2a	28	8		Sec1	20	2
	37	13			17	0
Sec3	36	12			30	2
	27	4			19	0
	64	25			25	0
				Sec2	28	7
Sum	571	178			33	0
Average	31.1734				27	0
					32	2
					33	0
					28	2
Embryo ID	NPC	NPC-PSMAD+		Sec6	29	0
					39	1
Wek359-5 (1Ko/Ko, 3F/F)					27	4
Sec1	24	6			28	0
	60	14
	48	10		Sum	415	20
Sec2	69	23		Average	4.81928
Sec3	75	24
	83	19
Sum	359	96
Average	26.7409
				Embryo ID	NPC	NPC-PSMAD+
Embryo ID	NPC	NPC-PSMAD+		Wek359-5 (Six2:Cre, 1Ko/Ko, 3F/F)
Wek359-2 (1Ko/+, 3F/+)				Sec1	65	4
Sec1	96	26			41	3
Sec2	35	4		Sec2	37	0
Sec3	45	15			109	7
	47	6		Sec3	63	2
Sum	223	51			40	0
Average	22.87				40	2
				Sum	395	18
				Average	4.55696
